# Supplementary material
Source: Royal Society of Chemistry journal article supplement (https://www.rsc.org/suppdata/cc/1999/1749/903476e.doc)
Supplement: Supplementary file 1 [file 903476e.doc]

**Supplementary Data**

**Synthesis and Characterization of Conjugated Oligomers that Contain MLCT Chromophores**

# **Kevin D. Ley, Yiting Li, Jodie V. Johnson, David H. Powell and Kirk S. Schanze***

## Department of Chemistry, University of Florida

P.O. Box 117200, Gainesville, FL 32611-7200

# Supporting Information

# Detailed Description of the Synthesis and Spectroscopic Characterization of the Oligomers

### General Synthetic

### Diisopropylamine was distilled from KOH and tetrahydrofuran was distilled from sodium benzophenone ketyl and stored under argon. The synthesis of 5,5’-diethynyl-2,2’-bipyridine,1 2,5-diiodo-1,4-dioctadecyloxybenzene,2 and 2-iodo-1,4-dimethoxybenzene3 is described elsewhere. Copper(I) iodide, Pd(PPh3)2Cl2, 4,4’-diiodobiphenyl and 4-bromobiphenyl were purchased from Aldrich Chemical Co. and used without further purification. Trimethylsilylacetylene and 2-methyl-3-butyn-2-ol were obtained from GFS chemicals and used without further purification. All cross-coupling reactions using Pd(PPh3)2Cl2 were carried out under standard Schlenk and vacuum line techniques.

## **Synthesis of New Compounds**

Compound **5a**

4,4’-Diiodobiphenyl (5.75 g, 14.2 mmol), Pd(PPh)3Cl2 (298 mg, 0.426 mmol) and CuI (162 mg, 0.852 mmol) were combined in a Schlenk flask which was then purged with argon. A degassed mixture of trimethysilylacetylene (2.0 mL, 14.2 mmol), tetrahydrofuran (45 mL) and diisopropylamine (30 mL) was added to the Schlenk flask and the resulting solution was heated at 80C for 3 hrs. The heavy ammonium iodide salt formed immediately. After 3 hours 2-methyl-3-butyn-2-ol (7.0 mL, 71.0 mmol) was added. The solution turned from light yellow to dark black and heating was continued for an additional 6 hr. The solution was allowed to cool and after evaporation of the solvent the product was chromatographed on silica gel with 80:20 CHCl3/hexane affording **5a** as a white solid, yield 1.22 g (26%). 1H NMR (CDCl3)  7.51 (m, 8H), 2.18 (s, 1H), 1.64 (s, 6H), 0.27 (s, 9H). 13C NMR (CDCl3) 140.1, 139.9, 132.4, 132.1, 126.7, 126.6, 122.3, 121.9, 104.8, 95.2, 94.6, 81.8, 31.4, -0.05. EI-MS calcd for C22H24OSi: 332; found 332.

Compound **5b**

Methanol (20 mL) and 20% NaOH (5 mL) were added to **5a** (1.0 g, 3.0 mmol) and the resulting solution was stirred rapidly. The mixture, which immediately became viscous, was stirred at room temperature for 5 hr. The reaction mixture was diluted with 100 mL of water and extracted with 300 mL of CHCl3. The organic layer was separated, dried and the solvent evaporated leaving a brown solid which was chromatographed on silica gel with 80:20 CHCl3/hexane eluant to afford 730 mg of **5b** (94% yield). TLC RF = 0.3 (silica, CHCl3/hexane, 80:20). 1H NMR (CDCl3)  7.54 (m, 8H), 3.15 (s, 1H), 2.18 (s, 1H), 1.64 (s, 6H). 13C NMR (CDCl3) 140.5, 139.8, 132.6, 132.0, 126.7, 126.6, 122.1, 121.3, 94.7, 83.4, 81.8, 78.1, 65.6, 31.4. EI-MS calcd for C19H16O: 260; found 260.

Compound **6**

Compound 5b (1.0 g, 3.84 mmol), 1,4-diiodo-2,5-dioctadecyloxybenzene (3.33 g, 3.84 mmol), Pd(PPh3)2Cl2 (0.08 g, 0.115 mmol) and CuI (0.044 g, 0.230 mmol) were combined in a Schlenk flask which was then purged with argon. A degassed mixture of THF (50 mL) and diisopropylamine (50 mL) was added to the solids and the resulting solution was heated to 80º C and stirred for 3 hr. After evaporation of the solvents, the crude solid was purified by chromatograpy on silica gel with 7:3 CHCl3/hexane eluant to afford 1.07 g of 6 (28% yield). TLC RF = 0.4 (silica, CHCl3/hexane, 7:3). 1H NMR (CDCl3) 7.54 (m, 8H), 7.31 (s, 1H), 6.92 (s, 1H), 3.98 (m, 4H), 2.18 (s, 1H), 1.83 (br m, 4H), 1.64 (s, 6H), 1.51 (br m, 4H), 1.25 (br s, 56H), 0.88 (t, 6H). 13C NMR (CDCl3) 154.3, 151.8, 140.0, 139.9, 132.1, 131.9, 126.8, 126.7, 123.8, 122.7, 121.9, 115.8, 113.5, 94.6, 93.9, 87.6, 86.6, 81.9, 70.1, 69.8, 65.6, 31.9, 31.4, 29.7, 29.3, 26.0, 22.7, 14.1. EI-MS calcd for C61H91IO3: 999; found 999.

A major by-product of this reaction is the di-substituted product, 2,5-bis-[4’-(3-hydroxy-3-methyl-1-butynyl)biphenylethynyl]-1,4-dioctadecyloxybenzene. This material is recovered as a yellow solid from the chromatography, yield 1.50 g (34%). TLC RF = 0.1 (silica, CHCl3/hexane, 7:3). 1H NMR (CDCl3)  7.54 (m, 16H), 7.04 (s, 2H), 4.05 (t, 4H), 2.18 (s, 2H), 1.83 (br m, 4H), 1.64 (s, 12H), 1.51 (br m, 4H), 1.25 (br s, 56H), 0.88 (t, 6H). 13C NMR (CDCl3) 153.7, 140.0, 139.8, 132.1, 132.0, 126.8, 126.7, 122.7, 122.0, 116.8, 114.0, 94.7, 87.0, 81.9, 69.6, 65.6, 31.8, 31.4, 29.6, 29.4, 26.0, 22.7, 14.1. Elem. Anal.: calcd for C80H106O4: C, 84.90; H, 9.44; found: C, 84.55; H, 9.97.

Protected Oligomer 7a

5,5’-Diethynyl-2,2’-bipyridine (0.100 g, 0.489 mmol), 6 (1.0 g, 1.00 mmol), Pd(PPh3)2Cl2 (0.021 g, 0.029 mmol) and CuI (0.011 g, 0.058 mmol) were combined in a Schlenk flask which was then degassed with argon. A degassed mixture of THF (50 mL) and diisopropylamine (30 mL) was added to the Schlenk flask and the resulting solution was heated at 80º C for 10 hrs. The solution was cooled and the solvents removed under vacuum. Chromatography on silica gel with 80:20 CHCl3/hexane mixture afforded an orange solid, yield 751 mg (79%). 1H-NMR (300 MHz, CDCl3)  8.83 (s, 2H), 8.44 (dd, 2H), 7.93 (dd, 2H), 7.54 (m, 16H), 7.05 (s, 4H), 4.05 (br t, 8H), 2.18 (s, 2H), 1.88 (br m, 8H), 1.64 (s, 12H), 1.58 (br m, 8H), 1.23 (br s, 112H), 0.88 (br t, 12H); 13C-NMR (75.4 MHz, CDCl3) 153.8, 153.6, 151.6, 139.9, 139.2, 132.1, 132.0, 126.8, 126.7, 122.6, 122.0, 120.8, 120.6, 116.8, 116.7, 114.7, 113.0, 95.1, 94.7, 91.7, 90.7, 86.8, 81.9, 69.6, 69.5, 65.6, 31.9, 31.5, 29.7, 29.3, 26.1, 26.0, 22.7, 14.1; APCI MS calcd for C136H189N2O6 [M+H+]: 1947.9; found 1947.9.

Oligomer 7b

Protected oligomer 7a (600 mg, 0.308 mmol) was dissolved in 10 mL of toluene and the solution was thoroughly degassed with argon for 1 hr. Crushed potassium hydroxide (138 mg, 2.46 mmol) was added and the Schlenk tube that contained the solution was immersed for 5 minutes into an oil bath that had been pre-heated to 110 ºC. The reaction mixture was cooled and then extracted with CHCl3. Evaporation of the solvent afforded compound 7a, yield 589 mg (91%). 1H-NMR (300 MHz, CDCl3)  8.83 (s, 2H), 8.44 (dd, 2H), 7.93 (dd, 2H), 7.54 (m, 16H), 7.05 (s, 4H), 4.05 (br t, 8H), 3.15 (s, 2H), 1.88 (br m, 8H), 1.58 (br m, 8H), 1.23 (br s, 112H), 0.88 (br t, 12H).

Protected Oligomer 8a

Oligomer 7b (0.350 g, 0.191 mmol), 6 (0.391 g, 0.392 mmol), Pd(PPh3)2Cl2 (0.008 g, 0.012 mmol) and CuI (0.004 g, 0.022 mmol) were combined in a Schlenk flask which was then degassed with argon. A degassed mixture of THF (20 mL) and diisopropylamine (10 mL) was added to the Schlenk flask and the resulting solution was heated at 80º C for 8 hrs. The solution was cooled and the solvents removed under vacuum. Chromatography on silica gel with a 70:30 CHCl3/hexane mixture afforded 8a as an orange solid, yield 0.532 g (78%). 1H NMR (CDCl3) 8.83 (br s, 2H), 8.44 (br d, 2H), 7.93 (br d, 2H), 7.55 (br s, 32H), 7.05 (br s, 8H), 4.05 (br t, 16H), 2.18 (br s, 2H), 1.88 (br m, 16H) 1.64 (s, 12H), 1.58 (br m, 16H), 1.23 (br s, 224H), 0.87 (br t, 24H). 13C NMR (CDCl3, partial) 154.5, 154.2, 154.1, 152.1, 140.5, 140.4, 139.6, 132.5, 127.2, 124.3, 123.2, 123.1, 122.4, 121.1, 121.0, 117.3, 116.3, 115.1, 114.5, 113.6, 111.6, 111.5, 95.5, 95.2, 95.1, 92.2, 90.9, 87.5, 87.2, 82.3, 70.0, 66.1, 32.4, 31.9, 29.9, 29.8, 26.5, 23.1, 14.5.

Oligomer 8b

Protected oligomer 8a (500 mg, 0.140 mmol) was dissolved in 10 mL of toluene and the solution was thoroughly degassed with argon for 1 hr. Crushed potassium hydroxide (63 mg, 1.12 mmol) was added and the Schlenk tube that contained the solution was immersed for 5 minutes into an oil bath that had been pre-heated to 110 ºC. The reaction mixture was cooled and then extracted with CHCl3. Evaporation of the solvent afforded compound 8b, yield 391 mg (81%). 1H NMR (CDCl3) 8.83 (br s, 2H), 8.44 (br d, 2H), 7.93 (br d, 2H), 7.55 (br s, 32H), 7.04 (br s, 8H), 4.05 (br t, 16H), 3.15 (s, 2H), 1.88 (br m, 16H), 1.58 (br m, 16H), 1.23 (br s, 224H), 0.87 (br t, 24H).

Oligomer 3

Oligomer 7b (0.300 g, 0.164 mmol), 2-iodo-1,4-dimethoxybenzene (0.217 g, 0.820 mmol), Pd(PPh3)2Cl2 (0.007 g, 0.0098 mmol) and CuI (0.004 g, 0.019 mmol) were combined in a Schlenk flask which was then degassed with argon. A degassed mixture of THF (20 mL) and diisopropylamine (10 mL) was added to the Schlenk flask and the resulting solution was heated at 80º C for 8 hrs. The solution was cooled and the solvents removed under vacuum. Chromatography on silica gel with a 70:30 CHCl3/hexane mixture afforded 3 as a flaky, orange solid, yield 255 mg (74%). 1H-NMR (300 MHz, CDCl3) 8.83 (s, 2H), 8.44 (dd, 2H), 7.93 (dd, 2H), 7.62 (br s, 16H), 7.06 (br s, 6HH), 6.86 (br d, 4H), 4.06 (br t, 8H), 3.89 (s, 6H), 3.79 (s, 6H), 1.88 (br m, 8H), 1.58 (br m, 8H), 1.23 (br s, 112H), 0.88 (br t, 12H); 13C-NMR (75.4 MHz, CDCl3) 154.5, 153.9, 153.8, 153.6, 153.2, 151.6, 140.0, 139.8, 139.1, 132.2, 132.0, 126.8, 126.7, 122.7, 122.6, 120.7, 120.6, 118.0, 116.8, 116.7, 115.8, 114.7, 113.0, 112.8, 112.0, 95.1, 93.2, 91.8, 90.6, 86.8, 86.7, 69.6, 69.5, 56.5, 55.7, 31.9, 29.7, 29.3, 26.1, 26.0, 22.7, 14.1; APCI MS calcd for C146H193N2O8 [M+H+]: 2104.0; found 2104.0.

Metal-Organic Oligomer Re-3

Oligomer 3 (0.100 g, 0.048 mmol) and Re(CO)5Cl (0.021 g, 0.057 mmol) were dissolved in 30 mL of toluene and then the solution was purged with argon and subsequently heated at 90 oC for 2 hrs. The solution color changed from light orange to deep red. During the course of the reaction the blue-green fluorescence characteristic of oligomer 3 disappeared. The solution was cooled and the toluene removed under vacuum, affording Re-3 as a brick red solid. The complex was purified by repeated rinsing with acetone, yield 110 mg (96%). 1H-NMR (300 MHz, CDCl3) 9.12 (s, 2H), 8.05 (m, 4H), 7.57 (br s, 16H), 7.06 (br s, 6H), 6.83 (br d, 4H), 4.06 (br t, 8H), 3.89 (s, 6H), 3.79 (s, 6H), 1.88 (br m, 8H), 1.58 (br m, 8H), 1.23 (br s, 112H), 0.88 (br t, 12H); 13C-NMR (75.4 MHz, CDCl3) 196.7, 189.0, 154.7, 154.4, 154.1,153.5, 153.2, 152.8, 140.2, 140.0, 139.7, 132.2, 132.1, 126.7, 126.6, 124.4, 122.9, 122.8, 122.4, 118.0, 116.6, 116.3, 115.9, 115.8, 112.8, 112.0, 111.3, 95.8, 95.4, 93.2, 89.0, 86.9, 86.8, 69.5, 69.4, 56.4, 55.7, 31.9, 29.7, 29.3, 26.1, 26.0, 22.7, 14.1; IR (KBr) 2926, 2854, 2205, 2026, 1928, 1902, 1600, 1502, 1466, 1417 cm‑1.

Oligomer 4

Oligomer 8b (0.325 g, 0.094 mmol), 2-iodo-1,4-dimethoxybenzene (0.124 g, 0.470 mmol), Pd(PPh3)2Cl2 (0.004 g, 0.0056 mmol) and CuI (0.002 g, 0.011 mmol) were combined in a Schlenk flask which was then degassed with argon. A degassed mixture of THF (20 mL) and diisopropylamine (10 mL) was added to the Schlenk flask and the resulting solution was heated at 80º C for 8 hrs. The solution was cooled and the solvents removed under vacuum. Chromatography on silica gel with a 60:40 CHCl3/hexane mixture afforded 4 as a flaky, yellow solid, yield 319 mg (91%). 1H-NMR (300 MHz, CDCl3) 8.83 (br s, 2H), 8.44 (br d, 2H), 7.93 (br d, 2H), 7.62 (br s, 32H), 7.05 (br s, 10HH), 6.86 (br d, 4H), 4.06 (br t, 16H), 3.90 (s, 6H), 3.80 (s, 6H), 1.88 (br m, 16H), 1.58 (br m, 16H), 1.23 (br s, 224H), 0.87 (br t, 24H). 13C-NMR (75.4 MHz, CDCl3, partial)  154.4, 154.0, 153.8, 153.6, 153.2, 151.6, 140.1, 139.9, 139.1, 132.0, 126.8, 122.8, 122.7, 120.7, 120.6, 118.1, 116.8, 115.8, 114.7, 114.0, 113.1, 112.9, 112.1, 95.1, 94.8, 93.2, 91.8, 90.6, 87.0, 86.7, 69.4, 56.5, 55.7, 31.9, 29.7, 29.4, 26.1, 22.7, 14.1.

Metal-Organic Oligomer Re-4

Oligomer 4 (0.100 g, 0.027 mmol) and Re(CO)5Cl (0.012 g, 0.032 mmol) were dissolved in 30 mL of toluene and then the solution was purged with argon and subsequently heated at 90 oC for 2 hrs. The solution color changed from light orange to deep red. During the course of the reaction the blue-green fluorescence characteristic of oligomer 4 disappeared. The solution was cooled and the toluene removed under vacuum, affording Re-4 as a bright red flaky solid. The complex was purified by repeated rinsing with acetone, yield 105 mg (96%). 1H-NMR (300 MHz, CDCl3) 9.15 (br s, 2H), 8.05 (br d, 4H), 7.61 (br s, 32H), 7.05 (br s, 10H), 6.87 (br d, 4H), 4.06 (br t, 16H), 3.90 (s, 6H), 3.80 (s, 6H), 1.88 (br m, 16H), 1.58 (br m, 16H), 1.23 (br s, 224H), 0.88 (br t, 24H); 13C-NMR (75.4 MHz, CDCl3, partial) 196.7, 189.0, 154.8, 154.5, 154.2, 153.7, 153.5, 153.2, 152.8, 140.2, 140.0, 139.7, 132.2, 132.1, 126.7, 122.9, 122.7, 118.0, 116.8, 116.4, 116.0, 114.0, 112.8, 112.0, 111.3, 95.8, 94.8, 93.2, 89.0, 87.0, 86.8, 69.5, 69.4, 56.4, 55.7, 31.9, 29.7, 29.3, 26.1, 22.7, 14.1; IR (KBr) 2928, 2854, 2204, 2026, 1928, 1902, 1600, 1502, 1466, 1417 cm-1.

Compound 9

1,4-dioctadecyloxy-2,5-diiodobenzene (2.22 g, 2.55 mmol), Pd(PPh3)2Cl2 (0.054 g, 0.076 mmol) and CuI (0.029 g, 0.153mmol) were combined in a Schlenk flask which was then purged with argon. A degassed mixture of THF (50 mL) and diisopropylamine (50 mL) was added to the solids in the Schlenk flask. Then 2-methyl-3-butyn-2-ol (0.25 mL, 2.55 mmol) was added slowly which induced the solution to change from a pale white to a dark black color. The resulting solution was heated at 80º C for 6 hr. The reaction mixture was cooled and the solvents removed under vacuum. The crude product was purified by chromatography on silica gel with 70:30 CHCl3/hexane as eluant, yield 803 mg (44%). TLC RF = 0.3 (silica, CHCl3/hexane, 7:3). 1H NMR (CDCl3)  7.27 (s, 1H), 6.80 (s, 1H), 3.93 (t, 4H), 2.18 (s, 1H), 1.80 (br m, 4H), 1.62 (s, 6H), 1.49 (br m, 4H), 1.26 (br s, 56H), 0.88 (t, 6H). 13C NMR (CDCl3) 154.3, 151.7, 123.7, 116.1, 112.9, 98.6, 87.4, 78.2, 70.0, 69.7, 65.7, 31.9, 31.4, 29.7, 29.4, 26.0, 22.7, 14.1. EI-MS calcd for C47H83IO3: 822; found 822.

Protected Oligomer 10a

5,5’-Diethynyl-2,2’-bipyridine (0.138 g, 0.678 mmol), 9 (1.15 g, 1.39 mmol), Pd(PPh3)2Cl2 (0.029 g, 0.040 mmol) and CuI (0.016 g, 0.082 mmol) were combined in a Schlenk flask which was then purged with argon. A degassed mixture of THF (60 mL) and diisopropylamine (40 mL) was added and the resulting solution was heated at 80º C for 14 hr. The solution was cooled and the solvents removed under vacuum. Chromatography on silica gel with 70:30 ethyl ether / hexane afforded 10a as a yellow solid, yield 832 mg (77%). 1H-NMR (300 MHz, CDCl3) 8.80 (s, 2H), 8.43 (dd, 2H), 7.92 (dd, 2H), 6.98 (s, 2H), 6.92 (s, 2H), 4.0 (m, 8H), 2.18 (br s, 2H), 1.88 (br m, 8H), 1.64 (s, 12H), 1.58 (br m, 8H), 1.23 (br s, 112H), 0.88 (br t, 12H). 13C-NMR (75.4 MHz, CDCl3) 153.9, 153.7, 153.6, 151.6, 139.2, 120.7, 120.6, 116.9, 116.7, 114.0, 113.0, 99.5, 91.5, 90.4, 78.4, 69.5, 69.4, 65.7, 31.9, 31.4, 29.7, 29.3, 26.0, 22.6, 14.1; APCI MS calc’d for C108H173N2O6 [M+H+]: 1595.5; found 1595.5.

Oligomer 10b

Protected oligomer 10a (700 mg, 0.438 mmol) was dissolved in 10 mL of toluene and the solution was thoroughly degassed with argon for 1 hr. Crushed potassium hydroxide (0.196 g, 3.50 mmol) was added and the Schlenk tube that contained the solution was immersed for 5 minutes into an oil bath that had been pre-heated to 110 ºC. The reaction mixuture was cooled and then extracted with CHCl3. Evaporation of the solvent afforded compound 10b, yield 589 mg (91%). 1H-NMR (300 MHz, CDCl3)  8.81 (s, 2H), 8.44 (dd, 2H), 7.92 (dd, 2H), 7.01 (s, 2H), 6.99 (s, 2H), 4.01 (br t, 8H), 3.36 (s, 2H), 1.85 (br m, 8H), 1.58 (br m, 8H), 1.23 ( br s, 112H), 0.88 (br t, 12H).

Oligomer 2

4-bromobiphenyl (0.189 g, 0.812 mmol), 10b (0.300 g, 0.203 mmol), Pd(PPh3)2Cl2 (0.008 g, 0.012 mmol) and CuI (0.005g, 0.024 mmol) were combined in a Schlenk flask which was then purged with argon. A degassed mixture of THF (20 mL) and diisopropylamine (10 mL) was added and the resulting solution was heated at 80º C for 16 hr. The solution was cooled and the solvents removed under vacuum. Chromatography on silica gel with 70:30 CHCl3/hexane afforded 2 as a bright yellow solid, yield 246 mg (68%). 1H-NMR (300 MHz, CDCl3) 8.83 (s, 2H), 8.44 (dd, 2H), 7.93 (dd, 2H), 7.60 (m, 12H), 7.46 (t, 4H), 7.37 (d, 2H), 7.05 (s, 4H), 4.04 (br t, 8H), 1.85 (br m, 8H), 1.58 (br m, 8H), 1.23 (br s, 112H), 0.88 (br t, 12H); 13C-NMR (75.4 MHz, CDCl3) 153.9, 153.8, 153.6, 151.7, 141.0, 140.3, 139.1, 132.0, 128.8, 127.6, 126.9, 122.2, 121.7, 120.8, 120.6, 116.8, 116.7, 114.8, 113.0, 95.2, 91.7, 90.6, 86.6, 69.7, 69.5, 31.9, 29.7, 29.4, 26.1, 26.0, 22.7, 14.1; APCI MS calc’d for C126H177N2O4 [M+H+]: 1783.6; found 1783.6.

Metal-Organic Oligomer Re-2

Oligomer 2 (0.100 g, 0.056 mmol) and Re(CO)5Cl (0.024 g, 0.067 mmol) were dissolved in 30 mL of toluene, the solution was purged with argon and then was heated at 90 oC for 2 hrs. The solution color changed from light yellow to deep red. During the course of the reaction the blue-green fluorescence characteristic of 2 disappeared. The solution was cooled and the toluene was removed under vacuum. The complex was purified by repeated rinsing with acetone. The metallated oligomer was obtained as a dark red solid, yield 107 mg (92%). 1H-NMR (300 MHz, CDCl3) 9.12 (s, 2H), 8.02 (d, 2H), 7.90 (d, 2H), 7.56 (m, 12H), 7.42 (t, 4H), 7.37 (d, 2H), 7.01 (s, 2H), 6.99 (s, 2H), 4.04 (br t, 8H), 1.85 (br m, 8H), 1.58 (br m, 8H), 1.23 (br s, 112H), 0.88 (br t, 12H); 13C-NMR (75.4 MHz, CDCl3) 196.7, 189.0, 154.7, 154.2, 153.5, 152.8, 141.0, 140.3, 140.1, 132.0, 128.8, 127.6, 126.9, 124.4, 122.9, 122.6, 122.1, 116.6, 116.3, 116.0, 111.2, 95.9, 95.5, 88.9, 86.5, 69.5, 69.4, 31.9, 29.7, 29.3, 26.1, 25.9, 22.7, 14.1; IR (KBr) 2924, 2851, 2206, 2025, 1927, 1902, 1596, 1498, 1467, 1417 cm-1.

Oligomer 1

2-Iodo-1,4-dimethoxyybenzene (0.562 g, 2.16 mmol), 5,5’-diethynyl-2,2’-bipyridine (0.200 g, 0.980 mmol), Pd(PPh3)2Cl2 (0.041 g, 0.058 mmol) and CuI (0.023 g, 0.120 mmol) were combined in a Schlenk flask which was then degassed with argon. A degassed mixture of THF (8 mL) and diisopropylamine (5 mL) was added to the Schlenk flask and the resulting solution was heated at 80º C for 10 hrs. The solution was cooled and the solvents removed under vacuum. Chromatography on silica gel with a 60:40 CHCl3/hexane mixture afforded 1 as a pale-yellow solid, yield 358 mg (78%). 1H NMR (CDCl3)  8.83 (s, 2H), 8.42 (d, 2H), 7.96 (dd, 2H), 7.05 (d, 2H), 6.85 (m, 4H), 3.90 (s, 3H), 3.80 (s, 3H). 13C NMR (CDCl3) 154.5, 153.9, 153.2, 151.6, 139.3, 120.7, 120.5, 117.9, 116.5, 112.1, 111.9, 90.3, 90.1, 56.4, 55.8. APCI MS calcd for C30H25N2O4 [M+H+]: 477; found 477.

Metal-Organic Oligomer Re-1

Oligomer 1 (0.100 g, 0.210 mmol) and Re(CO)5Cl (0.091 g, 0.252 mmol) were dissolved in 30 mL of toluene, the solution was purged with argon and then was heated at 90 oC for 2 hrs. The solution color changed from light yellow to orange. During the course of the reaction the blue fluorescence characteristic of 1 disappeared. The solution was cooled and the toluene was removed under vacuum, yielding the product as an orange solid. The complex was purified by repeated rinsing with toluene and diethyl ether. The pure metallated oligomer was obtained as an orange solid, yield 149 mg (90%). 1H NMR (CDCl3) 9.16 (s, 2H), 8.10 (br s, 4H), 7.07 (s, 2H), 6.96 (d, 2H), 6.89 (d, 2H), 3.91 (s, 6H), 3.82 (s, 6H). 13C NMR (CDCl3) 196.7, 189.0, 155.3, 155.2, 153.2, 153.0, 140.5, 124.7, 122.6, 118.6, 117.9, 112.0, 110.8, 94.9, 87.5, 56.4, 55.9. HRMS (FAB, positive ion, NBA) calcd for C33H24O7N2ReCl (M+) 782.083, found 782.084; calcd for C33H24O7N2Re (M-Cl+) 747.114, found 747.112.

References for Supporting Information

1. F. M. Romero and R. Ziessel, Tetrahedron Lett. 1994, 35, 9203.

2. K. D. Ley and K. S. Schanze, Coord. Chem. Rev. 1998, 171, 287.

3. A. Manoucher and T. Wallace, Tetrahedron 1988, 44, 5939.
